# Supplementary material for: Embedded bioprinting of dense cellular constructs in bone allograft-enhanced hydrogel matrices for bone tissue engineering
Source: Royal Society of Chemistry journal article supplement (doi:10.1039/d4bm01616e), 2025-01-01
Supplement: d4bm01616e3.pdf [file d4bm01616e3.pdf]

## Embedded Bioprinting of Dense Cellular Constructs in Bone Allograft-Enhanced Hydrogel Matrices for Bone Tissue Engineering

Hang Truong,<sup>#a</sup> Alperen Abaci,<sup>#a</sup> Hadis Gharacheh,<sup>a</sup> and Murat Guvendiren <sup>\*a,b</sup>

<sup>a</sup> Otto H. York Chemical and Materials Engineering, New Jersey Institute of Technology, Newark, NJ 07102 USA

<sup>b</sup> Department of Biomedical Engineering, New Jersey Institute of Technology, Newark, NJ 07102 USA

### SUPPLEMENTARY INFORMATION

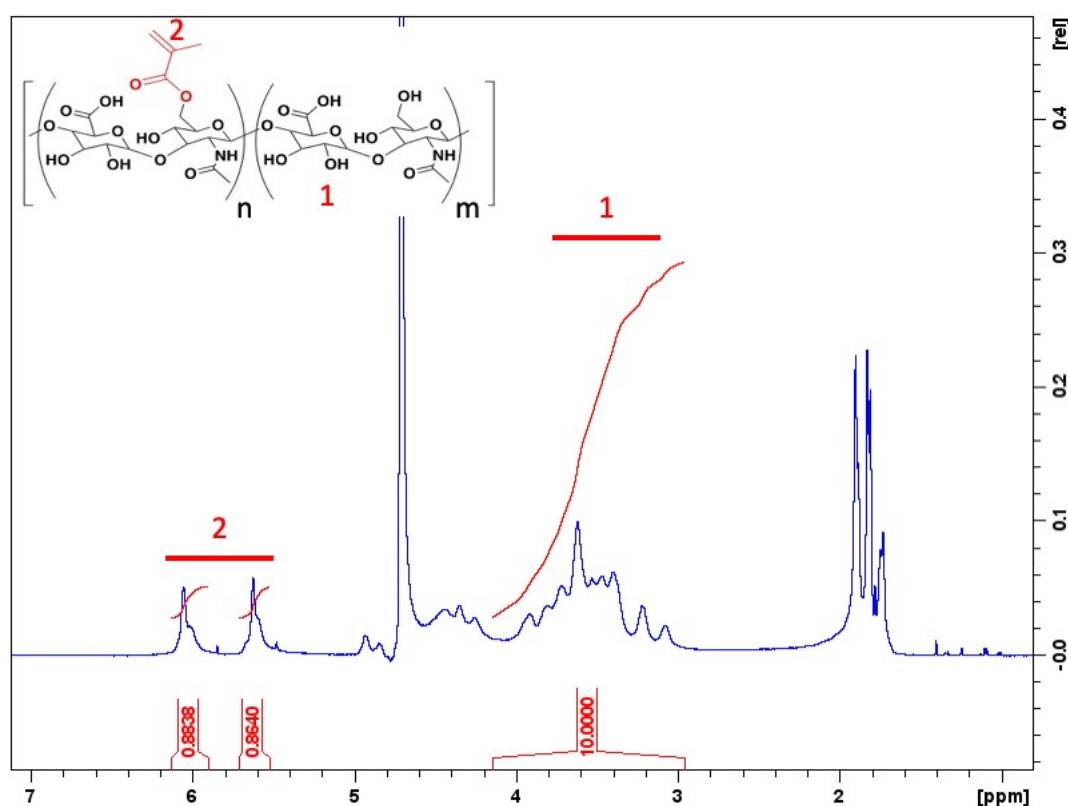

**Supplementary Figure S1.** <sup>1</sup>H NMR spectrum of methacrylated hyaluronic acid (MeHA), with the functionalization was of ~87%, determined from the integration of the vinyl group ( $\delta=5.8$ , 1 H and  $\delta=6.25$ , 1 H) with respect to the HA backbone ( $\delta=3.20-4.20$ , 10 H).

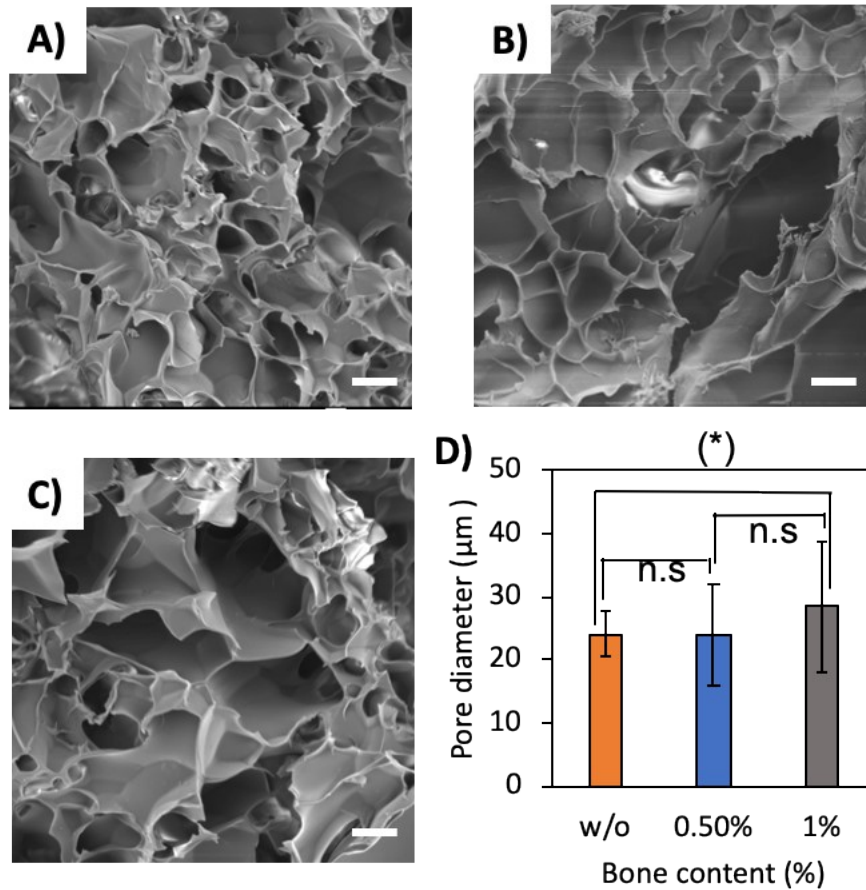

**Supplementary Figure S2.** SEM images reveal porous structures for cross-sectional morphology of MeHA (A), MeHA w/ 0.5% Bone (B) and MeHA w/ 1% Bone (C) and average pore diameter (D). Scale bar: 10 μm, n.s. denotes no significant difference, \* p < 0.05. For this study, MeHA without and with 0.5% and 1% bone were prepared, lyophilized, and analyzed using Scanning Electron Microscopy (SEM).
